# Supplementary material for: Novel lncRNA LNC_000113 Drives the Activation of Pulmonary Adventitial Fibroblasts through Modulating PTEN/Akt/FoxO1 Pathway
Source: MDPI journal article supplement (doi:10.3390/jcdd10060262), 2023-06-15

## *Supplementary Material*

**Table S1. Antibodies used in the experiment.**

| <b>Antibody targets</b> | <b>Supplier</b> | <b>Catalog. No.</b> | <b>Host</b> | <b>Applications</b> | <b>Molecular weight (kDa)</b> |
|-------------------------|-----------------|---------------------|-------------|---------------------|-------------------------------|
| Galectin-3              | Proteintech     | 14979-1-AP          | Rabbit      | WB (1:1000)         | 31                            |
| Collagen I              | Proteintech     | 14695-1-AP          | Rabbit      | WB (1:1000)         | 130                           |
| $\alpha$ -SMA           | Proteintech     | 14395-1-AP          | Rabbit      | WB (1:1000)         | 45                            |
| PTEN                    | Proteintech     | 22034-1-AP          | Rabbit      | WB (1:1000)         | 55                            |
| Akt                     | Cell Signaling  | 9272S               | Rabbit      | WB (1:1000)         | 60                            |
| p-Akt                   | Cell Signaling  | 9271S               | Rabbit      | WB (1:1000)         | 60                            |
| FoxO1                   | Cell Signaling  | 18592-1-AP          | Rabbit      | WB (1:2000)         | 70                            |
| p-FoxO1                 | Cell Signaling  | 9461S               | Rabbit      | WB (1:1000)         | 80                            |
| GAPDH                   | Proteintech     | 10494-1-AP          | Rabbit      | WB (1:5000)         | 37                            |

**Table S2. Primers for qRT-PCR**

| <b>Targets</b> | <b>Primer</b> | <b>Sequence(5'-3')</b> |
|----------------|---------------|------------------------|
| LNC_000113     | forward       | TCCCAATAGACGGCATAGTA   |
|                | reverse       | ACCATGATACTTAGATTCCG   |
| GAPDH          | forward       | TCTCTGCTCCTCCCTGTTCT   |
|                | reverse       | ATCCGTTTACACCGACCTTC   |

**Table S3. Sequences of probes for FISH**

5'-cy3-CCATTCTTCAAACTCCACTTACTACTATGCCGTCTA-cy3-3'

**Table S4. Sequences of targeting and control ASO GapmeRs**

| Sequence Description                | Oligonucleotide Sequence (5'-3')* |
|-------------------------------------|-----------------------------------|
| ASO targeting rat LNC_000113 (KO1)  | TAGTTCCCAGTATCAG                  |
| ASO targeting rat LNC_000113 (KO2)  | CGAATCTCAGTAACAT                  |
| Random sequence control ASO (NC KO) | TGGGCGTATAGACGTG                  |

\*The ASO GapmeRs were fully phosphorothioated.

**Table S5. Commercial kits used in the study**

| Kits name                                                     | Supplier                 | Catalog. No. |
|---------------------------------------------------------------|--------------------------|--------------|
| NEBNext® Ultra™ Directional RNA Library Prep Kit for Illumina | NEB, USA                 | E7420L       |
| TruSeq PE Cluster Kit v3-cBot-HS                              | Illumina                 | PE-401-3001  |
| RevertAid First Strand cDNA Synthesis Kit                     | Thermo Fisher Scientific | K1622        |
| SYBR Premix Ex Taq Kit                                        | Proteintech              | RR420        |
| Fluorescence in situ Hybridization Kit                        | RiboBio                  | C10910       |
| Lipofectamine RNAiMAX                                         | Invitrogen               | 13778150     |
| Cell Counting Kit-8                                           | Beyotime                 | C0039        |
| EdU assay Kit                                                 | Beyotime                 | C0071S       |
| BCA assay Kit                                                 | Beyotime                 | P0011        |

**Table S6. Information of the differentially expressed lncRNAs**

| Transcript ID      | Ensembl Gene ID    | lncRNA name    | lncRNA Type  | Chromosome | Start            | End              | Strand   | Exon number | Length     | log <sub>2</sub> (fold change) | p value         |
|--------------------|--------------------|----------------|--------------|------------|------------------|------------------|----------|-------------|------------|--------------------------------|-----------------|
| ENSRNOT00000077618 | ENSRNOG00000052761 | AC095390.1     | Annotated    | 12         | 51760127         | 51840207         | -        | 4           | 732        | -0.52                          | 0.004459        |
| ENSRNOT00000081586 | ENSRNOG00000060990 | AABR07000382.1 | Annotated    | 1          | 11766992         | 11772215         | +        | 6           | 1158       | 0.51                           | 0.004592        |
| LNC_001084         | -                  | -              | Novel        | 15         | 51464542         | 51465202         | +        | 2           | 510        | 0.60                           | 0.015006        |
| <b>LNC_000113</b>  | <b>-</b>           | <b>-</b>       | <b>Novel</b> | <b>1</b>   | <b>180643784</b> | <b>180700261</b> | <b>+</b> | <b>3</b>    | <b>501</b> | <b>3.87</b>                    | <b>0.019381</b> |
| ENSRNOT00000087733 | ENSRNOG00000061155 | LOC100911851   | Annotated    | 11         | 27566879         | 27577691         | +        | 5           | 2437       | -0.26                          | 0.022833        |
| LNC_003332         | -                  | -              | Novel        | 9          | 29458774         | 29526925         | -        | 2           | 228        | inf                            | 0.024961        |
| LNC_001740         | -                  | -              | Novel        | 2          | 18576098         | 18587270         | -        | 2           | 402        | 0.53                           | 0.041201        |

**Table S7. Sequence of lncRNA LNC\_000113**

chr1: 180643784-180700261

TGAGCCGAATCTGAGTAACATGGTGAATTCGGTTAGTTCCCAATAGACGGCATAGTAGTAAGTGGAGTTTTGAAGAATGGAATCTAAGTATCATG  
 GTGAATTCAGTAGGTTCCCTATAGGAATCGCATGTAATAAGCTTCTTATTCAATATAGAGAAACGTTTTAACGAACCTGAAACACTGTTTCTTTGTG  
 AATTCAGTTAGTTCCCAGTATCAGACTCTTGTAATATGTGTTGTTTTAAAGATTTATCAAAATTTCTTGAGCCGAATCTCAGTAACATGTTGAATTC  
 GGTTAGTTACCAATAGGCCACAGTAGTAATAAGTGGACTCTTCGGGATATAGAAAAATTTTCACGAATGGAATCAAAATTTTCAGGGCGAATTCAG  
 TGAGTTCCCAATGGGACATGATTGTCTGAGTGTGCTTTTCAATACAGAGCAACATTTTAAGGAACGGAATCTAAGTATCATGGTGAATTCATAGG  
 ATCCCAATAGGATTCGCATGTAA

**Figure S1. Knockdown efficiency of ASO GapmeRs**

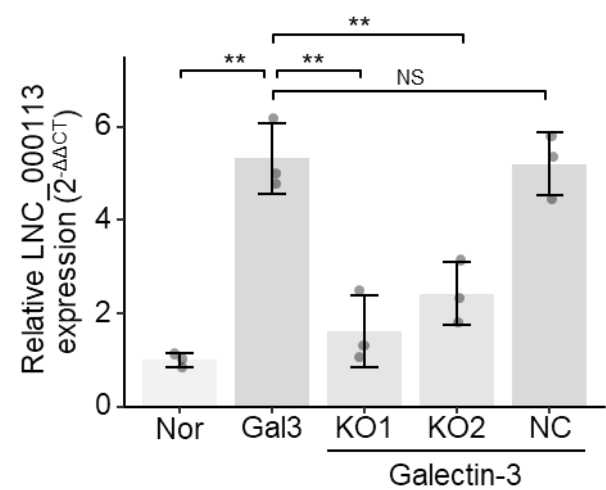

Supplement: s1 [file s1]
