# Supplementary material for: Novel lncRNA LNC_000113 Drives the Activation of Pulmonary Adventitial Fibroblasts through Modulating PTEN/Akt/FoxO1 Pathway
Source: MDPI journal article supplement (doi:10.3390/jcdd10060262), 2023-06-15

Original blots for  
Figure 1

Galectin 3

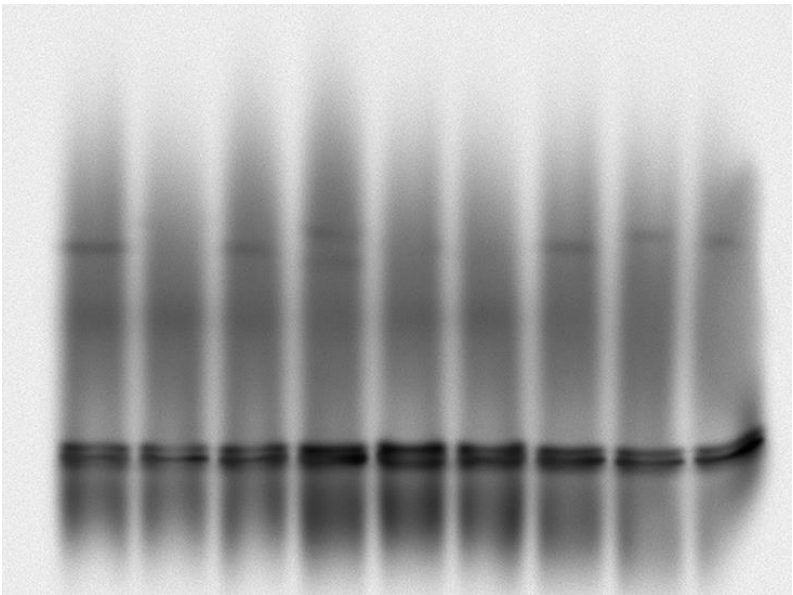

Collagen I

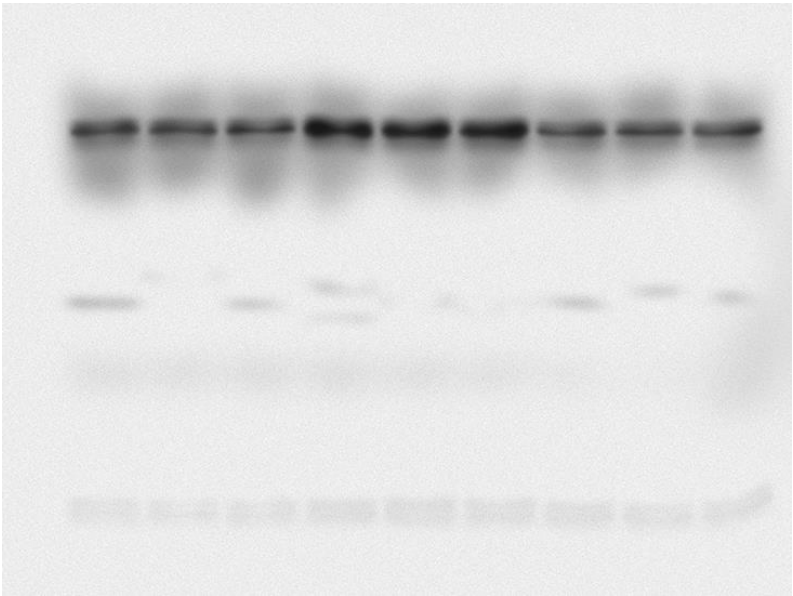

GAPDH

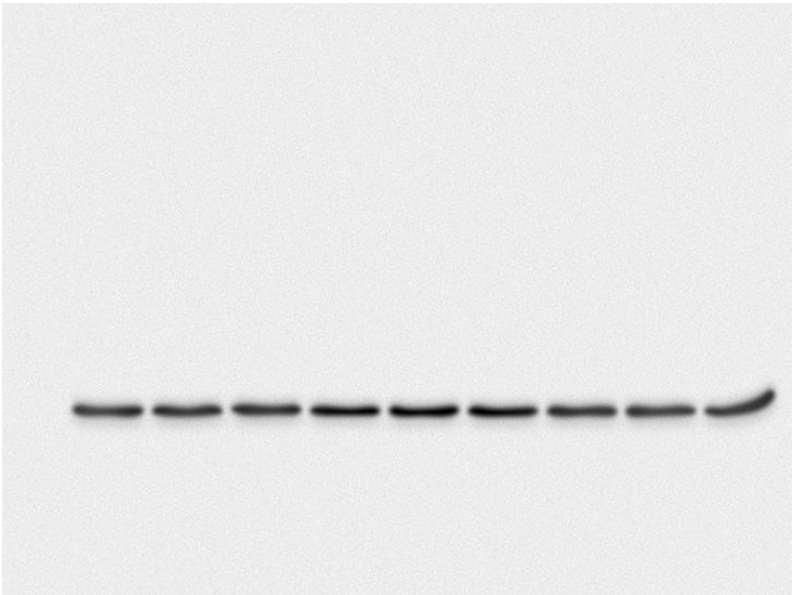

Original blots for  
Figure 4

SMA

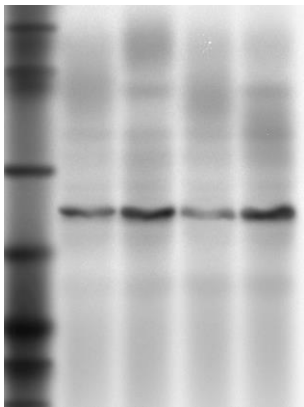

GAPDH

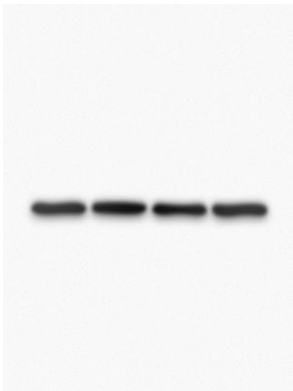

Original blots for  
Figure 4

PTEN

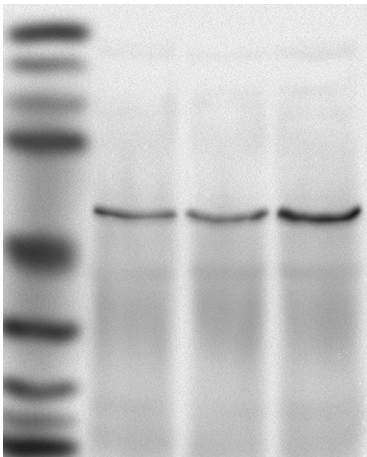

GAPDH

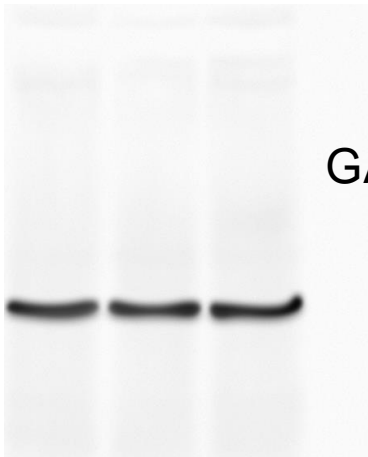

Akt

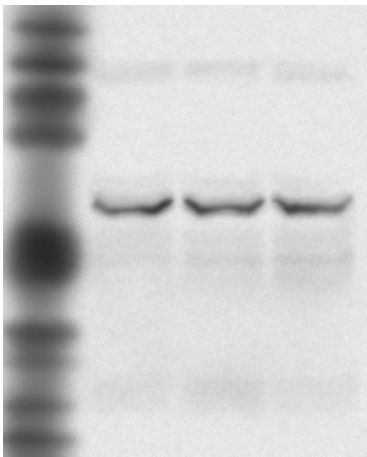

GAPDH

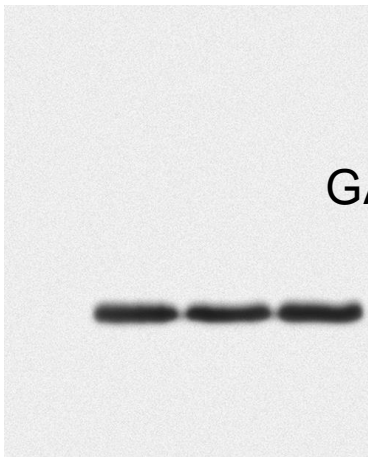

pAkt

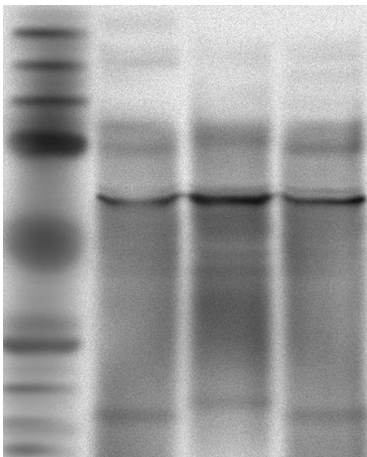

GAPDH

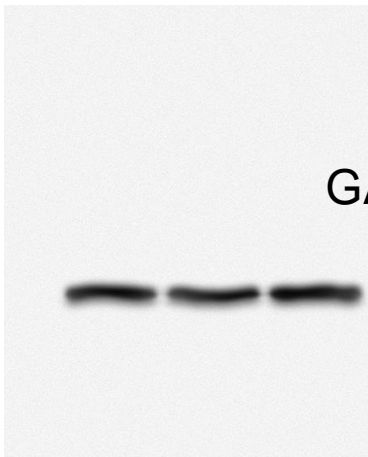

pFoxO1

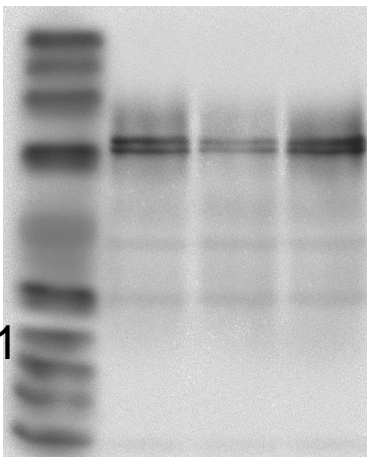

FoxO1

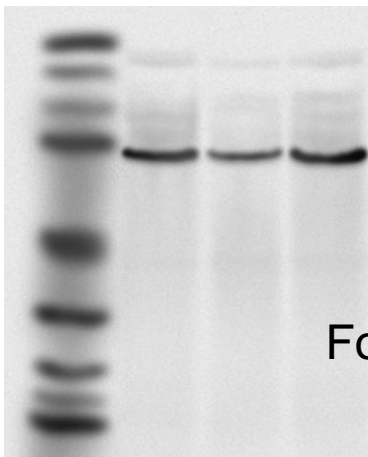

Supplement: s1 [file s1]
